# Supplementary material for: The distinct features of microbial ‘dysbiosis’ of Crohn’s disease do not occur to the same extent in their unaffected, genetically-linked kindred
Source: PubMed Central journal article supplement (PMC5319678; doi:10.1371/journal.pone.0172605), 2017-02-21

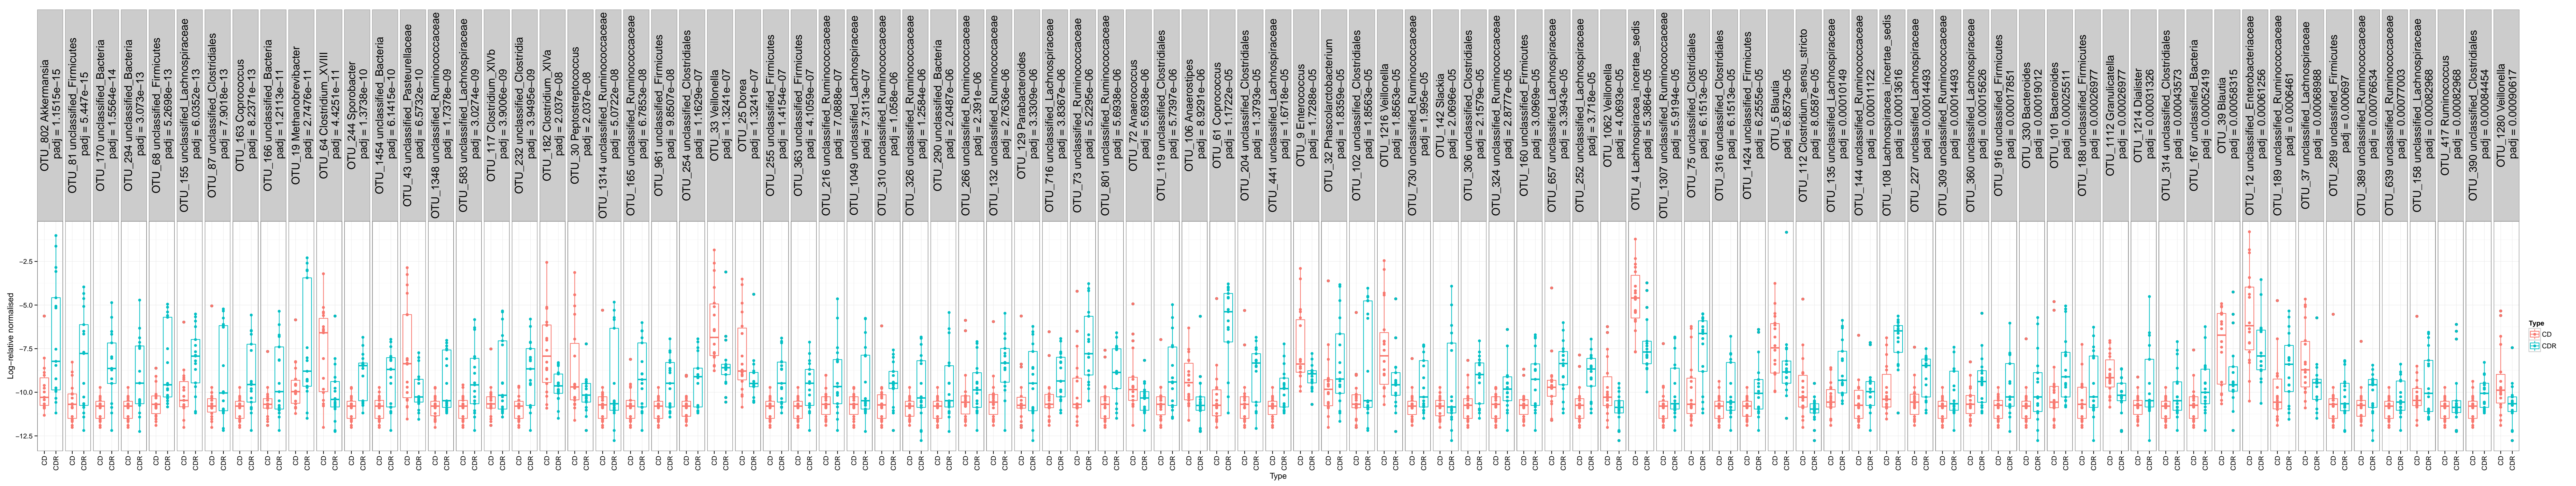

Supplement: pone.0172605.s001.pdf [file pone.0172605.s001.pdf]
